# Supplementary material for: ALS Associated Mutations in Matrin 3 Alter Protein-Protein Interactions and Impede mRNA Nuclear Export
Source: PubMed Central journal article supplement (PMC5674072; doi:10.1038/s41598-017-14924-6), 2017-11-06
Supplement: 41598_2017_14924_MOESM1_ESM.pdf [file 41598_2017_14924_MOESM1_ESM.pdf]

# **ALS Associated Mutations in Matrin 3 Alter Protein-Protein Interactions and Impede mRNA Nuclear Export**

**Authors:** Ashley Boehringer<sup>1,2</sup>, Krystine Garcia-Mansfield<sup>3</sup>, Gurkaran Singh<sup>1,2</sup>, Nadine Bakkar<sup>1</sup>, Patrick Pirrotte<sup>3,4</sup>, Robert Bowser<sup>1,4\*</sup>

## **Affiliations:**

<sup>1</sup>Department of Neurobiology, Barrow Neurological Institute, Phoenix, AZ, USA.

<sup>2</sup>School of Life Sciences, Arizona State University, Phoenix, AZ, USA.

<sup>3</sup>Collaborative Center for Translational Mass Spectrometry, Translational Genomics Research Institute, Phoenix, AZ, USA

<sup>4</sup>These authors jointly directed this work

\*To whom correspondence should be addressed: Robert Bowser, Department of Neurobiology, Barrow Neurological Institute, 350 W Thomas Road, Phoenix, AZ 85213.

Email: [Robert.bowser@dignityhealth.org](mailto:Robert.bowser@dignityhealth.org).

**Supplemental Table 1:**

| Accession | Gene      | Wild Type |       |        | Ser85Cys Mutant |       |        | Phe115Cys Mutant |       |        | Pro154Ser Mutant |       |        | Thr622Ala Mutant |       |        |
|-----------|-----------|-----------|-------|--------|-----------------|-------|--------|------------------|-------|--------|------------------|-------|--------|------------------|-------|--------|
|           |           | AvgP      | SAINT | Manual | AvgP            | SAINT | Manual | AvgP             | SAINT | Manual | AvgP             | SAINT | Manual | AvgP             | SAINT | Manual |
| Q60668    | Hnrnpd    |           | +++   | +++    | 1               | +++   | +++    | 1                | +++   | +++    | 1                | +++   | +++    | 1                | +++   | +++    |
| Q61029-3  | Tmpo      | 1         | ++    | +++    | 1               | +++   | +++    |                  |       |        | 0.96             | ++    | +++    |                  |       |        |
| P62270    | Rps18     | 1         | +++   | +++    |                 |       |        | 1                | +++   | +++    | 1                | ++    | +++    | 1                | ++    | +++    |
| P62301    | Rps13     | 1         | +++   | +++    |                 |       |        |                  | ++    | +++    | 0.98             | ++    | +++    | 0.99             | ++    | +++    |
| P84228    | Hist1h3b  | 0.99      | ++    | +++    |                 |       |        | 0.96             | ++    | +++    |                  |       |        |                  |       |        |
| O08583    | Alyref    | 0.98      | +     | +      |                 |       |        |                  |       |        |                  |       |        |                  |       |        |
| Q9D1J3    | Samp      | 0.97      | ++    | +++    |                 | +     | +++    |                  | ++    | +++    | 1                | ++    | +++    | 0.98             | ++    | +++    |
| Q9QXS1-7  | Plec      | 0.97      | ++    | +++    |                 | ++    | +++    |                  |       |        |                  |       |        |                  |       | +++    |
| Q9D554    | Sf3a3     | 0.87      | +     | +      |                 |       |        |                  |       |        |                  | +     |        |                  |       |        |
| P57784    | Snrpa1    | 0.85      | +     | +      |                 |       |        |                  | +     | +      |                  | +     |        |                  |       |        |
| Q8CH18    | Ccar1     | 0.84      | +     | +      | 0.74            | +     | +      | 0.88             | +     | +      |                  | +     |        |                  | +     |        |
| P62281    | Rps11     | 0.73      | +     | +      | 0.96            | ++    | +      | 0.9              | ++    | +      |                  | +     | +      | 0.87             | +     | +      |
| P08775    | Polr2a    | 0.71      | +     | +      |                 |       |        |                  | +     | +      | 0.74             | +     | +      |                  | +     | +      |
| Q8BG05    | Hnrnpa3   |           |       | +      | 1               | +     | +      | 1                | +     | +      |                  |       | +      |                  |       | +      |
| P05213    | Tuba1b    |           |       |        | 1               | +++   | +++    |                  |       |        |                  |       |        |                  | ++    | +++    |
| P99024    | Tubb5     |           |       |        | 1               | +++   | +++    |                  |       |        |                  |       |        |                  |       |        |
| Q91YR7    | Prpf6     |           |       |        | 0.96            | +     | +      |                  | +     |        | 0.87             | +     | +      |                  |       |        |
| Q9Z1N5    | Ddx39b    |           |       | +      | 0.95            | +     | +      |                  | +     | +      |                  | +     | +      |                  |       | +      |
| O35691    | Pnn       |           |       |        | 0.9             | +     | +      |                  |       |        |                  |       |        |                  |       |        |
| Q9D0E1    | Hnrmpm    |           |       |        | 0.88            | +     | +      |                  |       |        |                  |       |        |                  |       | +      |
| Q99M28    | Rnps1     |           | +     | +      | 0.85            | +     | +      |                  | +     | +      |                  | +     | +      | 0.82             | +     | +      |
| P14873    | Map1b     |           |       |        | 0.73            | +     | +      |                  | +     | +      | 0.72             | +     | +      | 0.98             | +     | +      |
| Q6NZF1    | Zc3h11a   |           | ++    | +++    |                 |       |        | 1                | ++    | +++    | 1                | +++   | +++    | 1                | +++   | +++    |
| P61358    | Rpl27     |           | +     | +++    |                 |       |        | 0.98             | ++    | +++    |                  | ++    | +++    | 0.96             | ++    | +++    |
| P68134    | Acta1     |           |       |        |                 |       |        | 0.98             | ++    | +++    |                  |       |        |                  |       |        |
| A2BDX3    | Mocs3     |           |       |        |                 | ++    | +++    | 0.98             | ++    | +++    |                  | ++    | +++    |                  |       |        |
| P62751    | Rpl23a    |           |       |        |                 | ++    | +++    | 0.95             | ++    | +++    |                  |       |        | 0.96             | ++    | +++    |
| Q9JHJ0    | Tmod3     |           | ++    | +++    |                 |       |        | 0.95             | ++    | +++    |                  |       |        |                  |       |        |
| Q9DBG3    | Ap2b1     |           | +     |        |                 |       |        | 0.9              | +     | +      | 0.86             | ++    | +      |                  | +     |        |
| Q8VHZ7    | Imp4      |           | +     |        |                 |       |        | 0.7              | +     |        |                  |       |        | 0.86             | +     | +      |
| Q8BG81    | Poldip3   |           | +     | +      |                 | +     | +      |                  | +     | +      | 1                | +     | +      | 0.71             | +     | +      |
| Q9Z1X4-2  | Ilf3      |           |       |        |                 |       |        |                  |       |        | 1                | ++    | +++    | 1                | +++   | +++    |
| Q9DB96    | Ngdn      |           |       |        |                 |       |        |                  | ++    | +++    | 0.98             | ++    | +++    | 0.98             | ++    | +++    |
| P62137    | Ppp1ca    |           | ++    | +++    |                 |       |        |                  | +     | +++    | 0.98             | ++    | +++    |                  | +     | +++    |
| Q8K4P0    | Wdr33     |           |       |        |                 |       |        |                  |       |        | 0.98             | ++    | +++    |                  | +     | +++    |
| P62911    | Rpl32     |           |       |        |                 |       |        |                  |       |        | 0.96             | ++    | +++    | 1                | ++    | +++    |
| P62267    | Rps23     |           |       |        |                 |       |        |                  | ++    | +++    | 0.96             | ++    | +++    | 0.96             | ++    | +++    |
| A2AIV2    | Kiaa1429  |           |       |        |                 |       |        |                  |       |        | 0.96             | ++    | +++    |                  |       |        |
| Q8BL97-4  | Srsf7     |           |       |        |                 |       |        |                  |       |        |                  |       |        | 1                | +++   | +++    |
| P20152    | Vim       |           |       |        |                 | +++   | +++    |                  |       |        |                  |       |        | 1                | ++    | +++    |
| Q6P5B0    | Rrp12     |           | +     | +++    |                 |       |        |                  | ++    | +++    |                  |       |        | 0.98             | ++    | +++    |
| Q8CGP2    | Hist1h2bp |           |       |        |                 |       |        |                  |       |        |                  |       |        | 0.98             | ++    | +++    |
| P62754    | Rps6      |           |       |        |                 | +     | +++    |                  |       |        |                  |       |        | 0.98             | ++    | +++    |
| Q9CZU3    | Skiv2l2   |           | +     | +++    |                 |       |        |                  | ++    | +++    |                  | ++    | +++    | 0.96             | ++    | +++    |
| Q8BMK4    | Ckap4     |           |       |        |                 |       |        |                  | +     | +++    |                  |       |        | 0.96             | ++    | +++    |
| Q8K4L0    | Ddx54     |           |       |        |                 |       |        |                  | ++    | +++    |                  | +     | +++    | 0.96             | ++    | +++    |
| Q07646    | Mest      |           |       |        |                 |       |        |                  |       |        |                  |       |        | 0.96             | ++    | +++    |
| P62849    | Rps24     |           |       |        |                 |       |        |                  | ++    | +++    |                  | +     | +++    | 0.96             | ++    | +++    |
| Q8C4J7    | Tbl3      |           |       |        |                 |       |        |                  | ++    | +++    |                  |       |        | 0.96             | ++    | +++    |
| Q501J6    | Ddx17     |           |       |        |                 |       |        |                  | +     |        |                  | +     |        | 0.94             | +     | +      |
| Q8CH25    | Sltm      |           |       |        |                 |       |        |                  | +     | +      |                  | +     | +      | 0.86             | +     | +      |
| Q921Y2    | Imp3      |           |       |        |                 |       |        |                  |       |        |                  |       |        | 0.75             | +     |        |
| P14869    | Rplp0     |           | +     |        |                 |       |        |                  | +     |        |                  | +     | +      | 0.7              | +     | +      |
| P02535    | Krt10     |           | +     |        |                 |       |        |                  | +     | +      |                  |       |        |                  |       |        |
| P56959    | Fus       |           | +     |        |                 |       |        |                  |       |        |                  |       |        |                  |       |        |
| Q8CFQ3    | Aqr       |           | +     |        |                 |       |        |                  |       |        |                  |       |        |                  |       |        |
| Q35326    | Srsf5     |           | +     | +      |                 | +     | +      |                  | +     | +      |                  | +     | +      |                  | +     | +      |
| Q9WV55    | Vapa      |           | +     |        |                 |       |        |                  |       |        |                  |       |        |                  | +     | +      |
| Q91VJ5    | Pqbp1     |           | +     |        |                 |       |        |                  | +     |        |                  |       |        |                  |       |        |
| O70503    | Hsd17b12  |           | +     |        |                 | +     | +      |                  | +     |        |                  |       |        |                  | +     | +      |
| Q9DAW6    | Prpf4     |           | +     |        |                 | +     |        |                  |       |        |                  |       |        |                  |       |        |
| Q8QZY9    | Sf3b4     |           | +     | +      |                 | +     |        |                  |       |        |                  |       |        |                  |       |        |
| Q8BTI8    | Srrm2     |           | +     |        |                 | +     |        |                  |       |        |                  | +     |        |                  |       |        |
| Q6NV83    | U2surp    |           | +     | +      |                 | +     |        |                  | +     | +      |                  | +     | +++    |                  |       |        |
| Q9D287    | Bcas2     |           | +     | +++    |                 |       |        |                  |       |        |                  |       |        |                  |       |        |
| P43276    | Hist1h1b  |           | +     | +++    |                 | +     | +++    |                  |       |        |                  |       |        |                  |       |        |
| P04104    | Krt1      |           | +     | +++    |                 | ++    | +++    |                  |       |        |                  |       |        |                  |       |        |
| Q99PL5    | Rrbp1     |           | +     | +++    |                 | +     | +++    |                  |       |        |                  |       |        |                  | ++    | +++    |
| Q9CQI7    | Snrpb2    |           | +     | +++    |                 | +     | +++    |                  | +     | +++    |                  |       |        |                  |       |        |
| Q9QX47    | Son       |           | +     | +++    |                 |       |        |                  |       |        |                  |       |        |                  |       |        |
| Q91VR2    | Atp5c1    |           | +     | +++    |                 |       |        |                  |       |        |                  |       |        |                  | +     | +++    |
| Q8BMS1    | Hadha     |           | +     | +++    |                 |       |        |                  |       |        |                  |       |        |                  |       |        |
| Q91YE7    | Rbm5      |           | +     | +++    |                 | +     | +++    |                  | ++    | +++    |                  | ++    | +++    |                  |       |        |



|        |         |  |  |   |  |    |     |  |    |     |  |  |   |     |  |  |    |     |     |
|--------|---------|--|--|---|--|----|-----|--|----|-----|--|--|---|-----|--|--|----|-----|-----|
| P51881 | Slc25a5 |  |  | + |  |    | +   |  |    |     |  |  |   |     |  |  |    |     |     |
| Q3UKJ7 | Smu1    |  |  |   |  | ++ | +++ |  |    |     |  |  |   |     |  |  |    |     |     |
| P27048 | Snrpb   |  |  |   |  |    | +++ |  |    |     |  |  |   |     |  |  |    |     |     |
| P62315 | Snrpd1  |  |  |   |  |    |     |  | +  | +++ |  |  |   |     |  |  |    |     |     |
| P15508 | Sptb    |  |  |   |  |    |     |  | +  | +++ |  |  |   |     |  |  |    |     |     |
| P47758 | Srpb    |  |  |   |  |    |     |  |    |     |  |  |   |     |  |  | ++ | +++ |     |
| Q9D0B0 | Srsf9   |  |  |   |  |    |     |  |    |     |  |  |   |     |  |  |    | +   |     |
| Q08943 | Ssrp1   |  |  |   |  | ++ | +++ |  | ++ | +++ |  |  |   |     |  |  |    |     |     |
| Q9WTS6 | Tenm3   |  |  |   |  | +  | +++ |  |    |     |  |  |   |     |  |  |    |     |     |
| Q9ERA6 | Tip11   |  |  |   |  |    |     |  | +  | +   |  |  |   |     |  |  |    |     |     |
| B1AZI6 | Thoc2   |  |  |   |  |    |     |  | +  | +++ |  |  |   |     |  |  | +  | +++ |     |
| Q62318 | Trim28  |  |  |   |  |    |     |  |    |     |  |  |   |     |  |  |    |     |     |
| P26369 | U2af2   |  |  | + |  |    |     |  |    |     |  |  |   |     |  |  |    |     |     |
| Q6EJB6 | Utp14b  |  |  |   |  | ++ | +++ |  | ++ | +++ |  |  | + | +++ |  |  |    |     |     |
| Q5SSI6 | Utp18   |  |  |   |  |    |     |  | +  |     |  |  |   |     |  |  |    | +   | +   |
| Q9J13  | Utp3    |  |  |   |  |    |     |  | +  |     |  |  |   |     |  |  |    |     |     |
| Q9DCD2 | Xab2    |  |  |   |  |    |     |  |    |     |  |  |   |     |  |  |    | +   |     |
| Q8BJ05 | Zc3h14  |  |  |   |  | +  | +++ |  |    |     |  |  |   |     |  |  |    |     |     |
| O88532 | Zfr     |  |  |   |  |    |     |  |    |     |  |  |   |     |  |  |    | +   | +++ |

**Supplemental Table 1:** High and medium confidence protein interactors of Matrin-3 wild-type, Ser85Cys mutant, Phe115Cys mutant, Pro154Ser mutant and Thr622Ala mutant. Plus signs signify a fold change over empty vector of  $\leq 10$  (+), 10-50 (++) or  $\geq 50$  (+++). Medium confidence protein interactors were defined as those identified in two out of three replicates and with a fold change  $\geq 2.5$  over empty vector in the manual analysis, or a fold change  $\geq 2.5$  over empty vector and an avgP  $\geq 0$  in the SAINTexpress analysis. High confidence interactors were those with a fold change  $\geq 2.5$  over empty vector in both the SAINTexpress analysis and the manual analysis along with a SAINTexpress avgP value  $\geq 0.7$ .

**Supplemental Table 2:**

| Case ID | Gender | Age | PMI (hrs) |
|---------|--------|-----|-----------|
| CON1    | F      | 74  | 3         |
| CON2    | M      | 81  | 17        |
| CON3    | F      | 57  | 32        |
| ALS1    | M      | 72  | 3         |
| ALS2    | M      | 39  | 5.5       |
| ALS3    | M      | 83  | 21        |

**Supplemental Table 2:** Patient Demographics of lumbar spinal cord tissues used in the study..

PMI = post-mortem interval;. All diagnoses were performed by licensed neuropathologists.

## Supplemental Figure 1

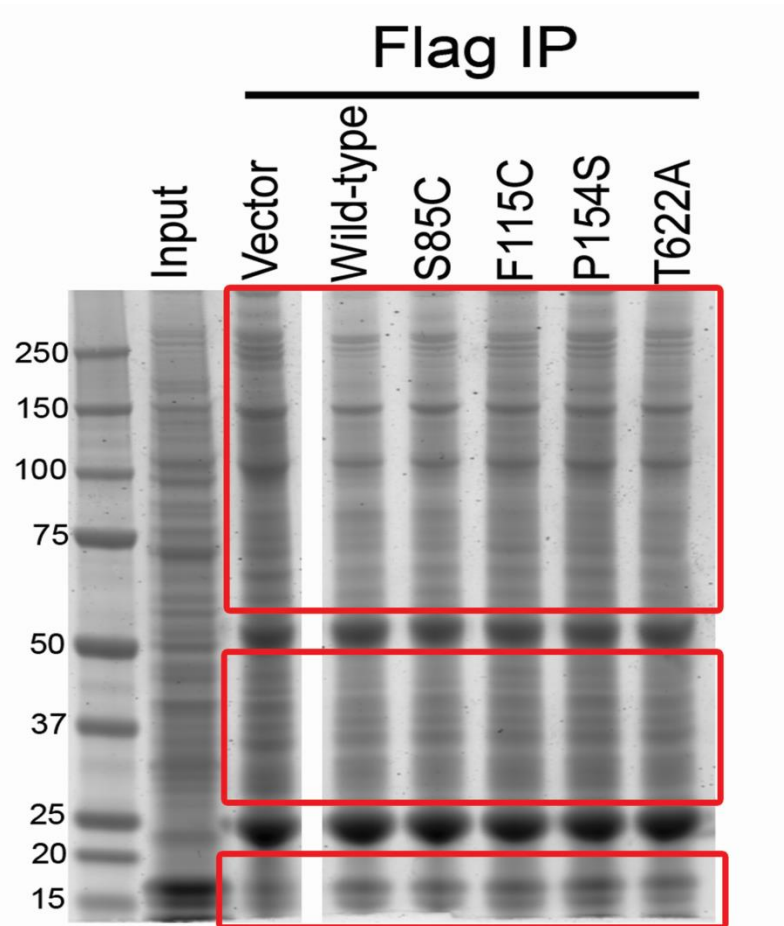

**SupplementalFigure 1:** Representative image of Coomassie stained gel after IP pull-down.

Input indicates total nuclear lysate before immunoprecipitation experiment (40 $\mu$ g of total protein) followed by immunoprecipitation using Flag agarose gel in NSC-34 cells stably expressing empty vector, wild-type Matrin 3 or one of the four mutations in Matrin 3. Red boxes indicate the area used for mass spectrometry experiments (IgG heavy and light chains were removed).

## Supplemental Figure 2

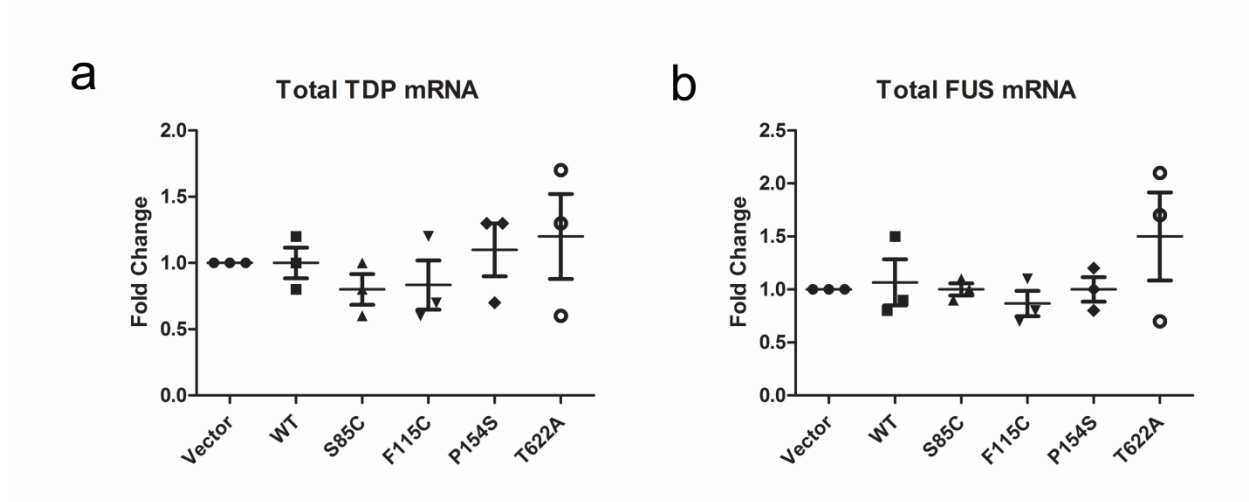

**Supplemental Figure 2:** Total TDP-43 and FUS mRNA levels by RT-PCR. Prior to fractionation experiments an aliquot of cells was separated and total RNA was extracted, followed by RT-PCR to determine the total levels of a) TDP-43 and b) FUS. mRNA levels were not altered by expression of wild-type or mutant Matrin 3. Error bars represent the mean  $\pm$  SEM of three independent experiments.

**Supplemental Figure 3**

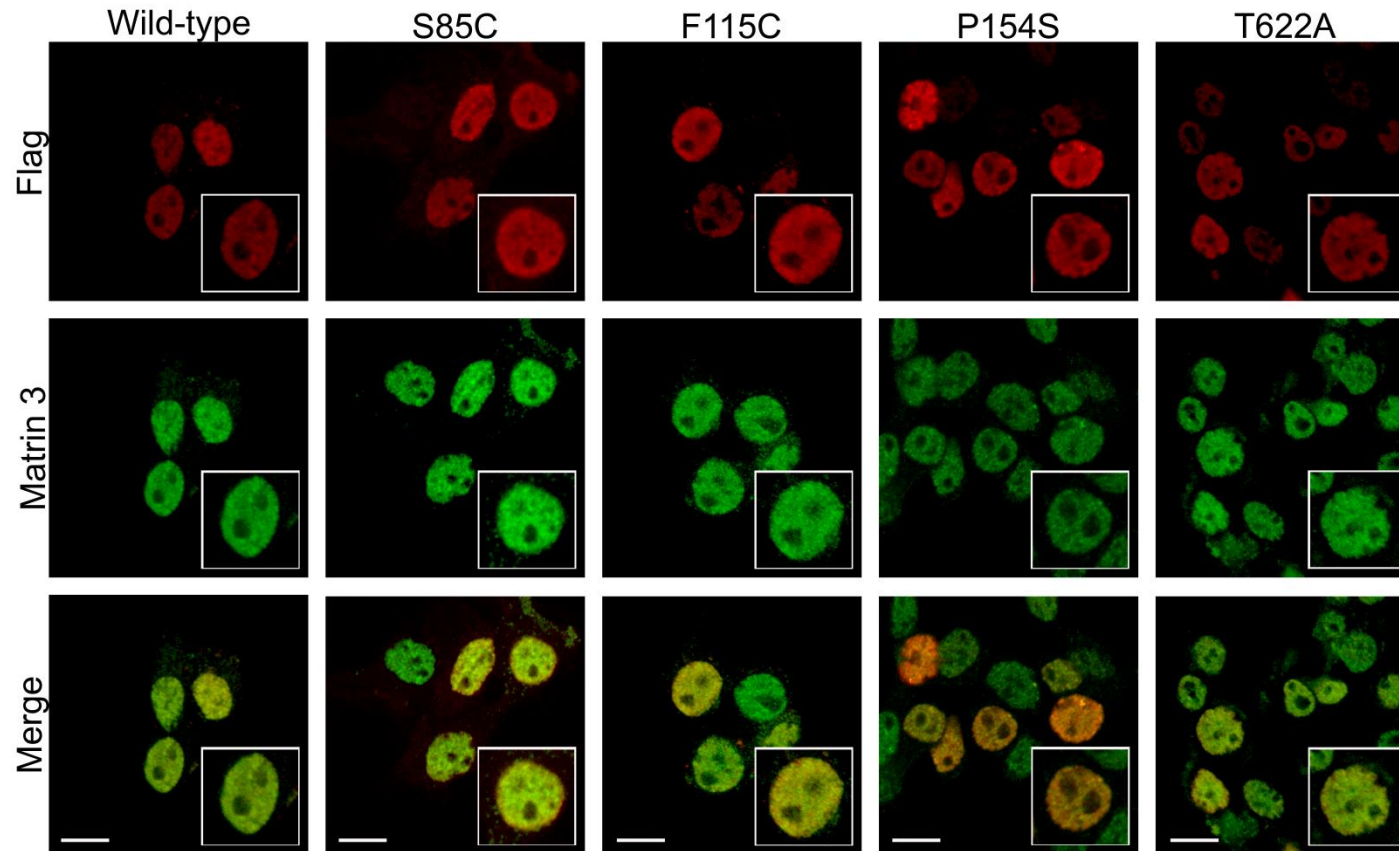

**Supplemental Figure 3:** Immunofluorescence images of NSC-34 cells transiently transfected with wild-type or mutant Matrin 3 then subjected to co-localization analysis. Representative images from immunofluorescence staining., flag is shown in red marking exogenous Matrin 3 and endogenous Matrin 3 is shown in green, merged image of two signals below. Insets indicate higher magnification images. Scale bar indicates 10 $\mu$ m.

**Supplemental Figure 4**

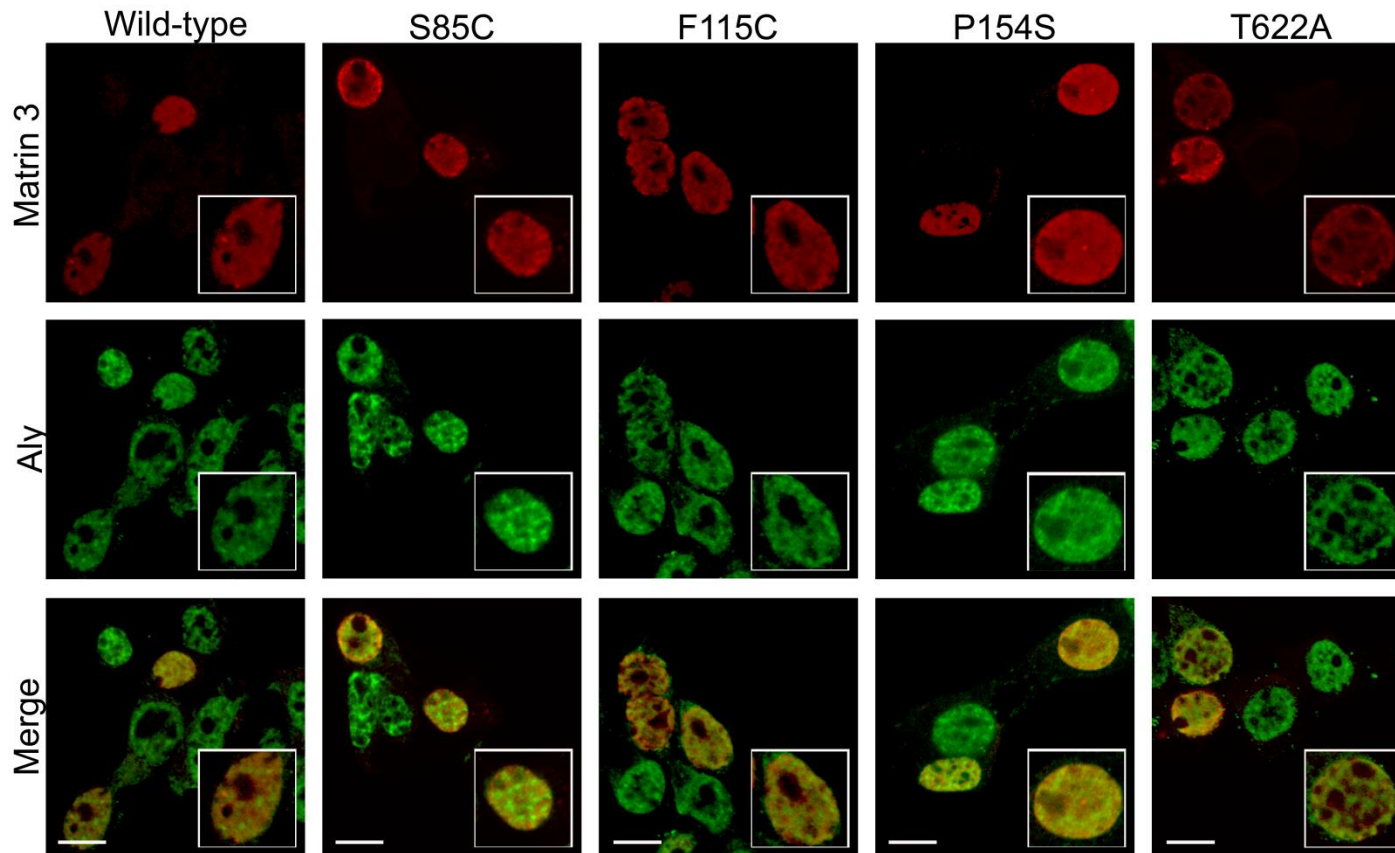

**Supplemental Figure 4:** Immunofluorescence images of NSC-34 cells transiently transfected with wild-type or mutant Matrin 3 then subjected to co-localization analysis. Representative images from immunofluorescence staining, flag is shown in red marking exogenous Matrin 3 and Aly is shown in green, merged image of two signals below. Insets indicate higher magnification images. Scale bar indicates 10 $\mu$ m.



**Supplemental Figure 5**

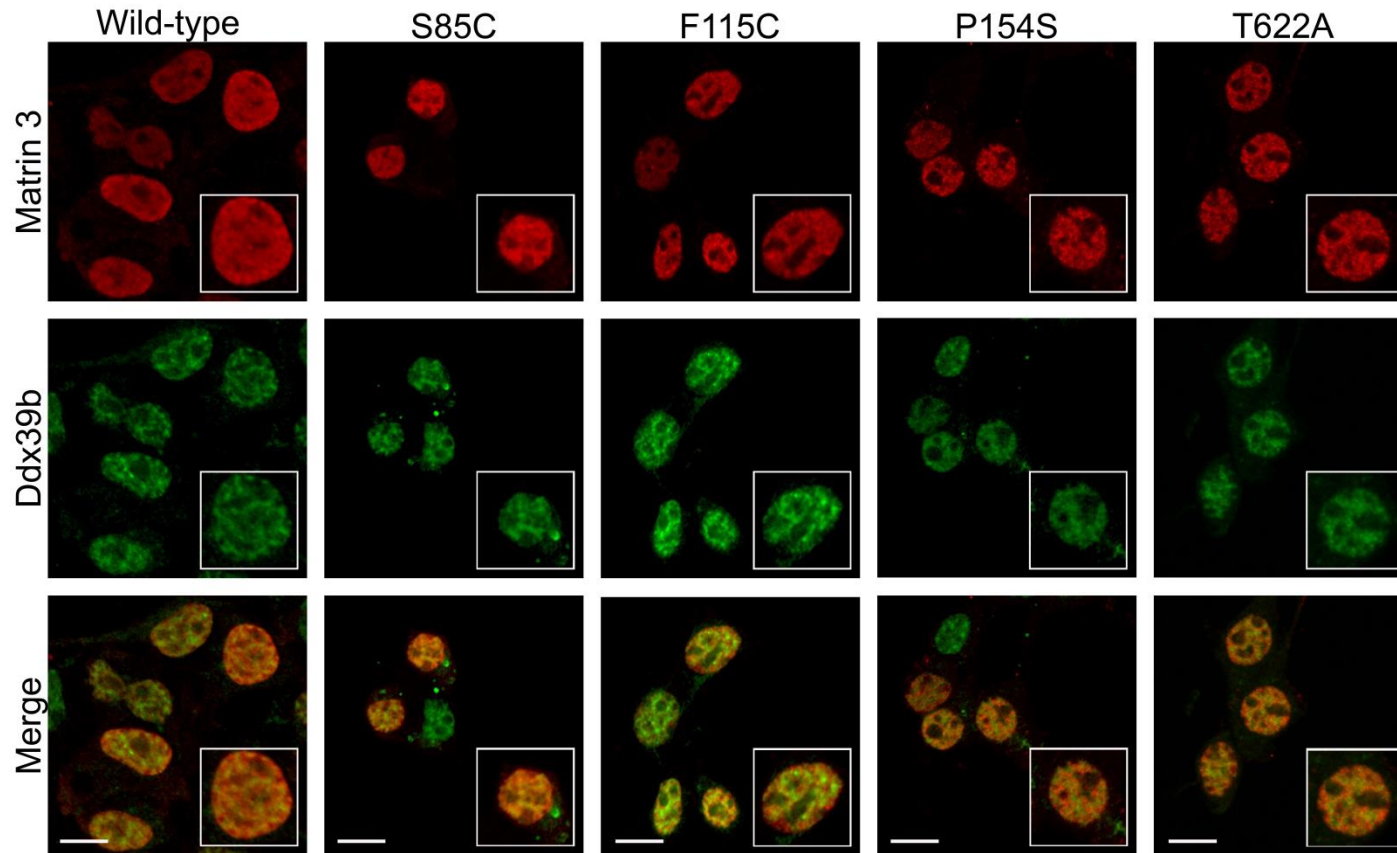

**Supplemental Figure 5:** Immunofluorescence images of NSC-34 cells transiently transfected with wild-type or mutant Matrins 3 then subjected to co-localization analysis. Representative images from immunofluorescence staining, flag is shown in red marking exogenous Matrins 3 and Ddx39b is shown in green, merged image of two signals below. Insets indicate higher magnification images. Scale bar indicates 10 $\mu$ m.

**Supplemental Figure 6**

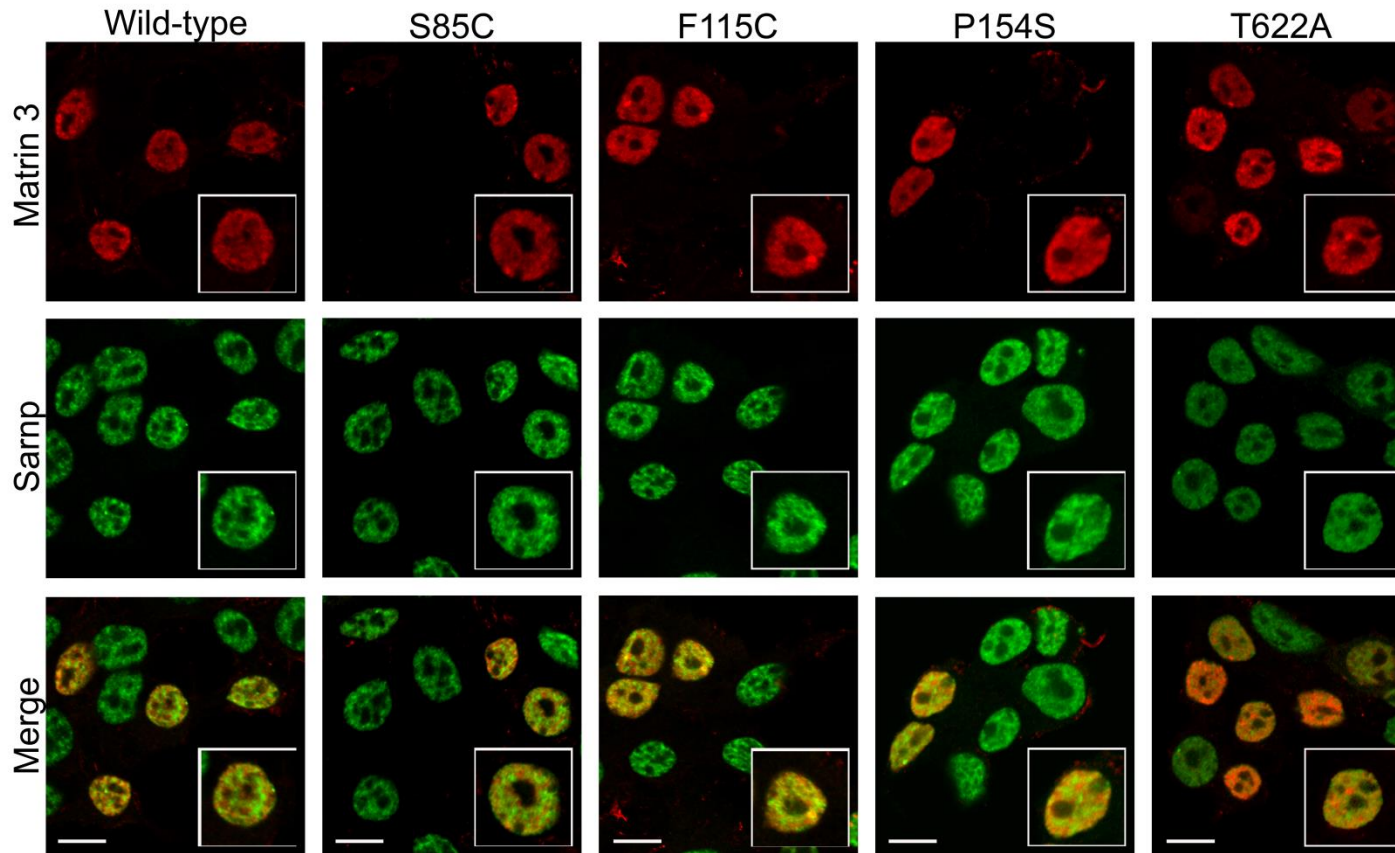

**Supplemental Figure 6:** Immunofluorescence images of NSC-34 cells transiently transfected with wild-type or mutant Matrin 3 then subjected to co-localization analysis. Representative images from immunofluorescence staining, flag is shown in red marking exogenous Matrin 3 and Sarnp is shown in green, merged image of two signals below. Insets indicate higher magnification images. Scale bar indicates 10 $\mu$ m.

## Supplementary Figure 7

### Figure 1c:

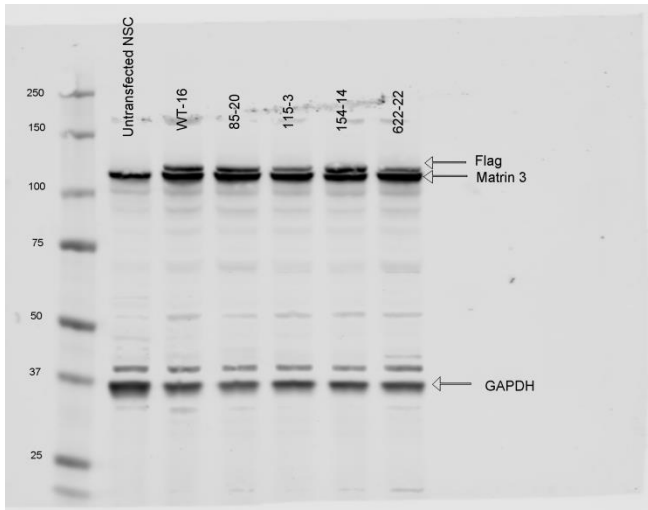

### Figure 4a:

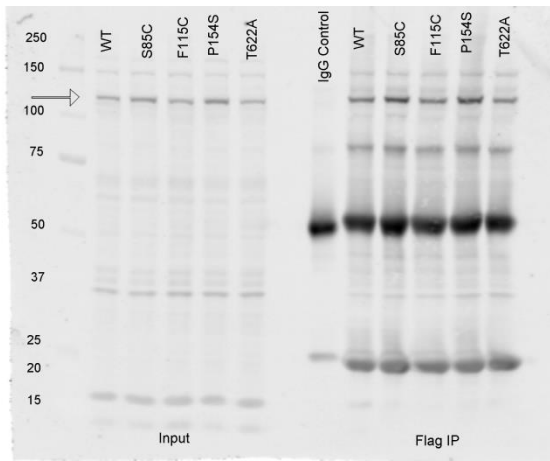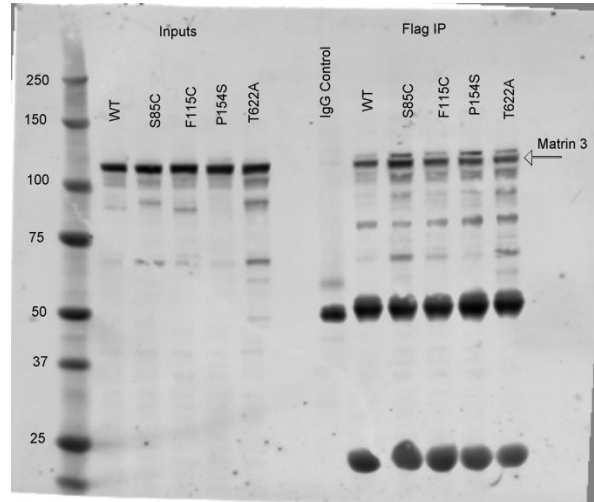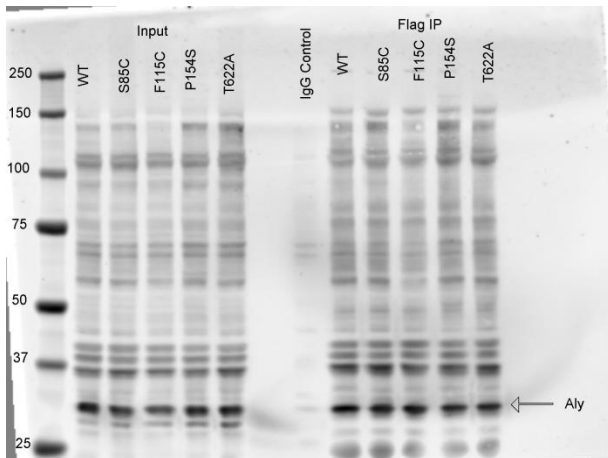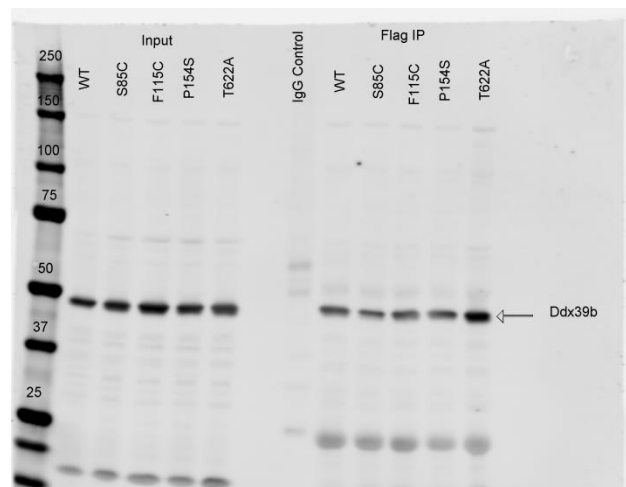

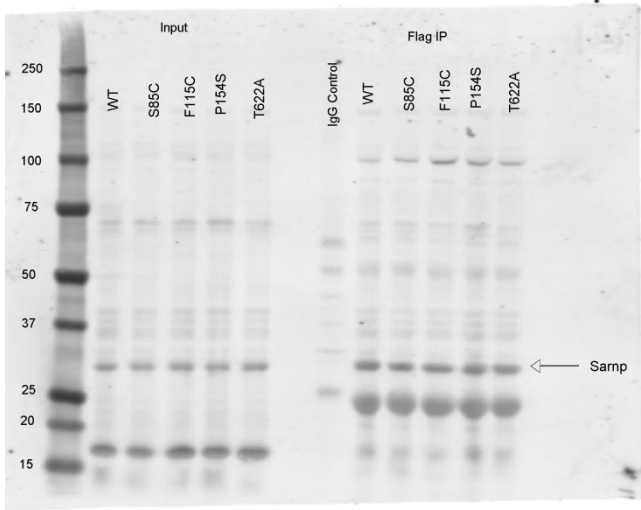

**Figure 4b:**

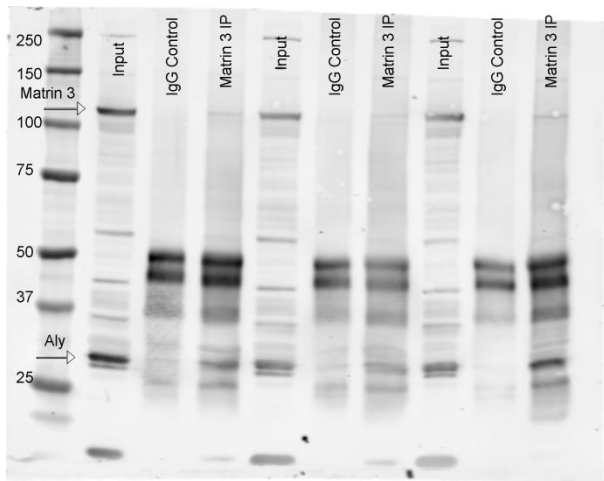

**Figure 4c:**

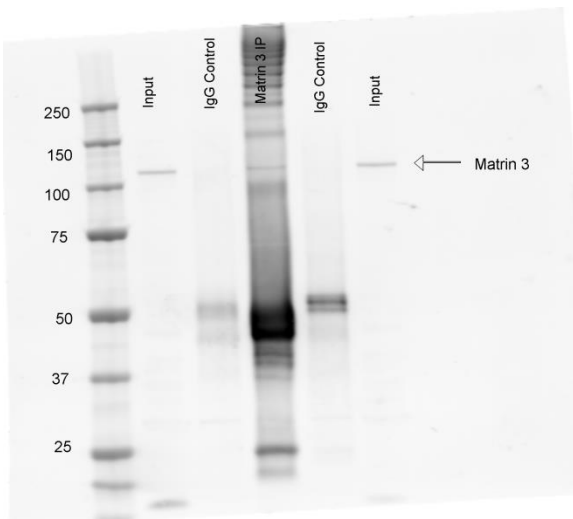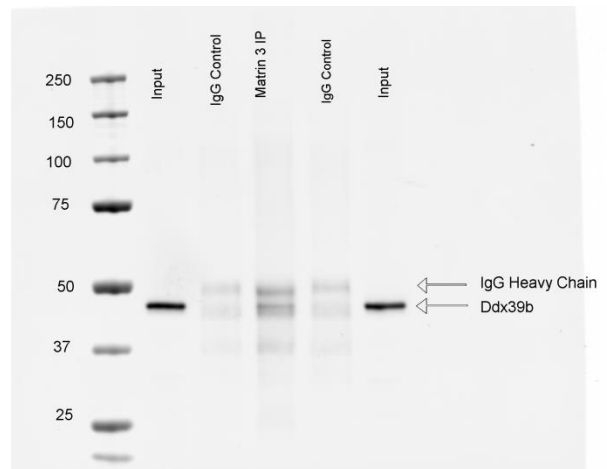

**Figure 4d:**

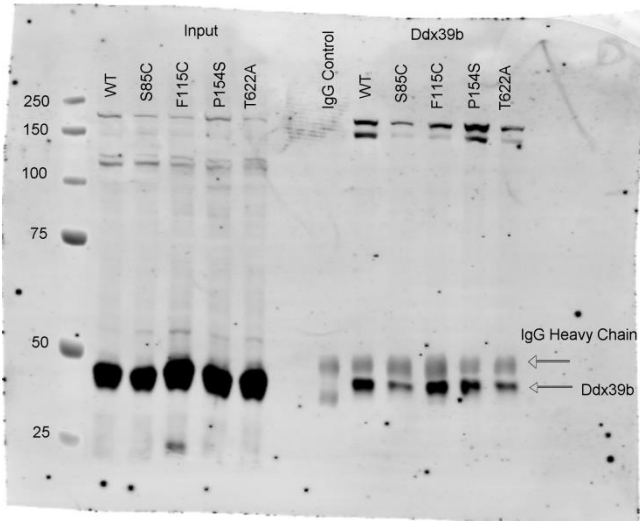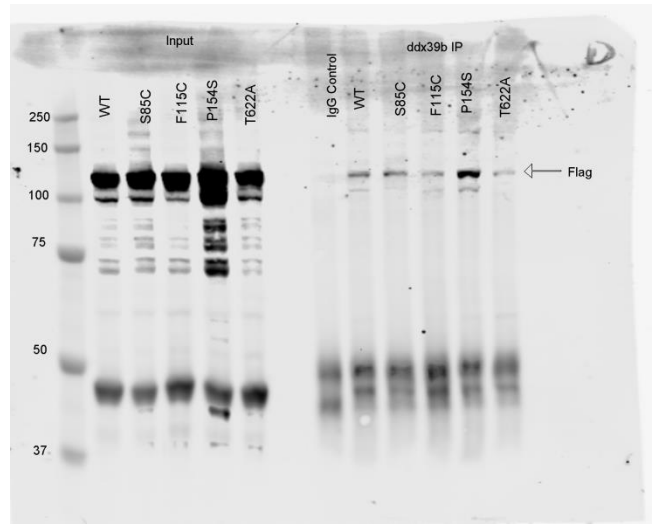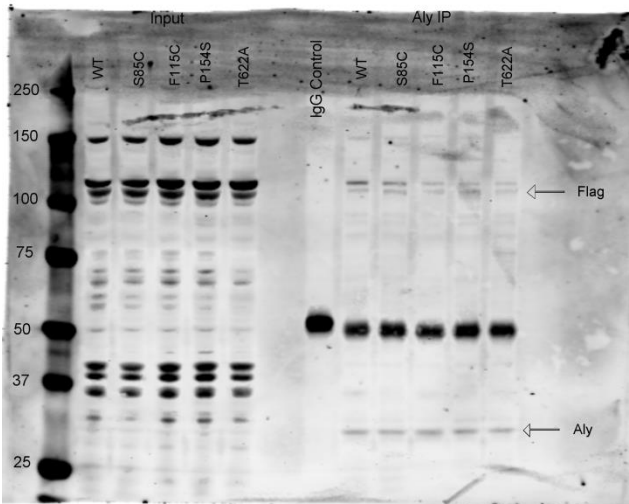

**Figure 4g:**

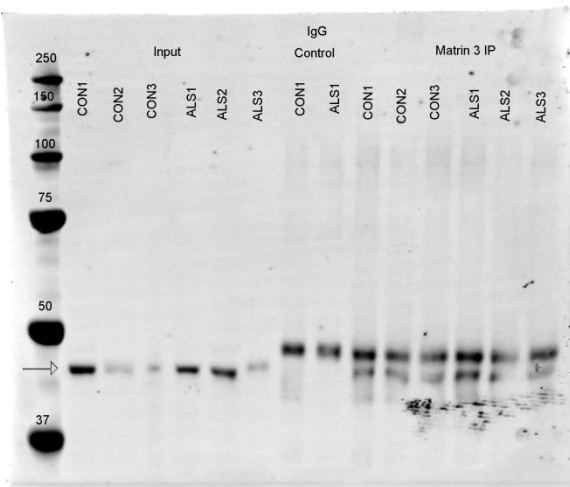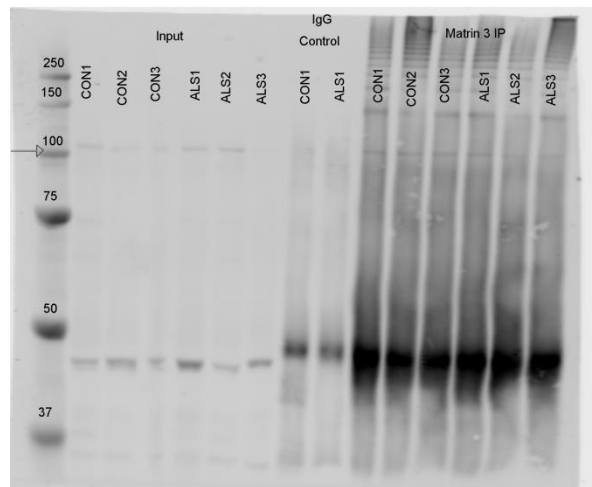

**Supplementary Figure 7:** Full length uncropped western blots shown in Figures 1c and 4a, 4b, 4c, 4d, 4g.
